# Supplementary material
Source: publisher figshare collection journal article supplement (https://acs.figshare.com/ndownloader/files/4261090)
Supplement: Supplementary file 1 [file 4261090]

# **Toxicity Evaluations of Superparamagnetic Iron Oxide Nanoparticles: Cell “Vision” Versus Physicochemical Properties of Nanoparticles**

Morteza Mahmoudi<sup>1,2\*</sup>, Sophie Laurent<sup>3</sup>, Mohammad A. Shokrgozar<sup>1</sup>, and Mohsen Hosseinkhani<sup>4,5\*</sup>

<sup>1</sup>National Cell Bank, Pasteur Institute of Iran, Tehran, 1316943551 Iran.

<sup>2</sup>Nanotechnology Research Centre, Faculty of Pharmacy, Tehran University of Medical Sciences, Tehran, Iran.

<sup>3</sup> Department of General, Organic, and Biomedical Chemistry, NMR and Molecular Imaging Laboratory, University of Mons, Avenue Maistriau, 19, B-7000 Mons, Belgium.

<sup>4</sup>Cardiovascular Research Center, Mount Sinai School of Medicine, New York, New York 10029, United States.

<sup>5</sup>National Institute of Genetic Engineering and Biotechnology (NIGEB), Tehran, Iran

\*Corresponding Author:

Mohsen Hosseinkhani, MD, PhD  
Cardiac Research Center, Mount Sinai School of Medicine  
New York, NY 10029  
(M.H.) email: [mohsen.hosseinkhani@mssm.edu](mailto:mohsen.hosseinkhani@mssm.edu),

Morteza Mahmoudi, PhD  
National Cell Bank, Pasteur Institute of Iran,  
Tehran, 1316943551 Iran  
(M.M.) Web: [www.biospion.com](http://www.biospion.com); e-mail: [Mahmoudi@biospion.com](mailto:Mahmoudi@biospion.com).

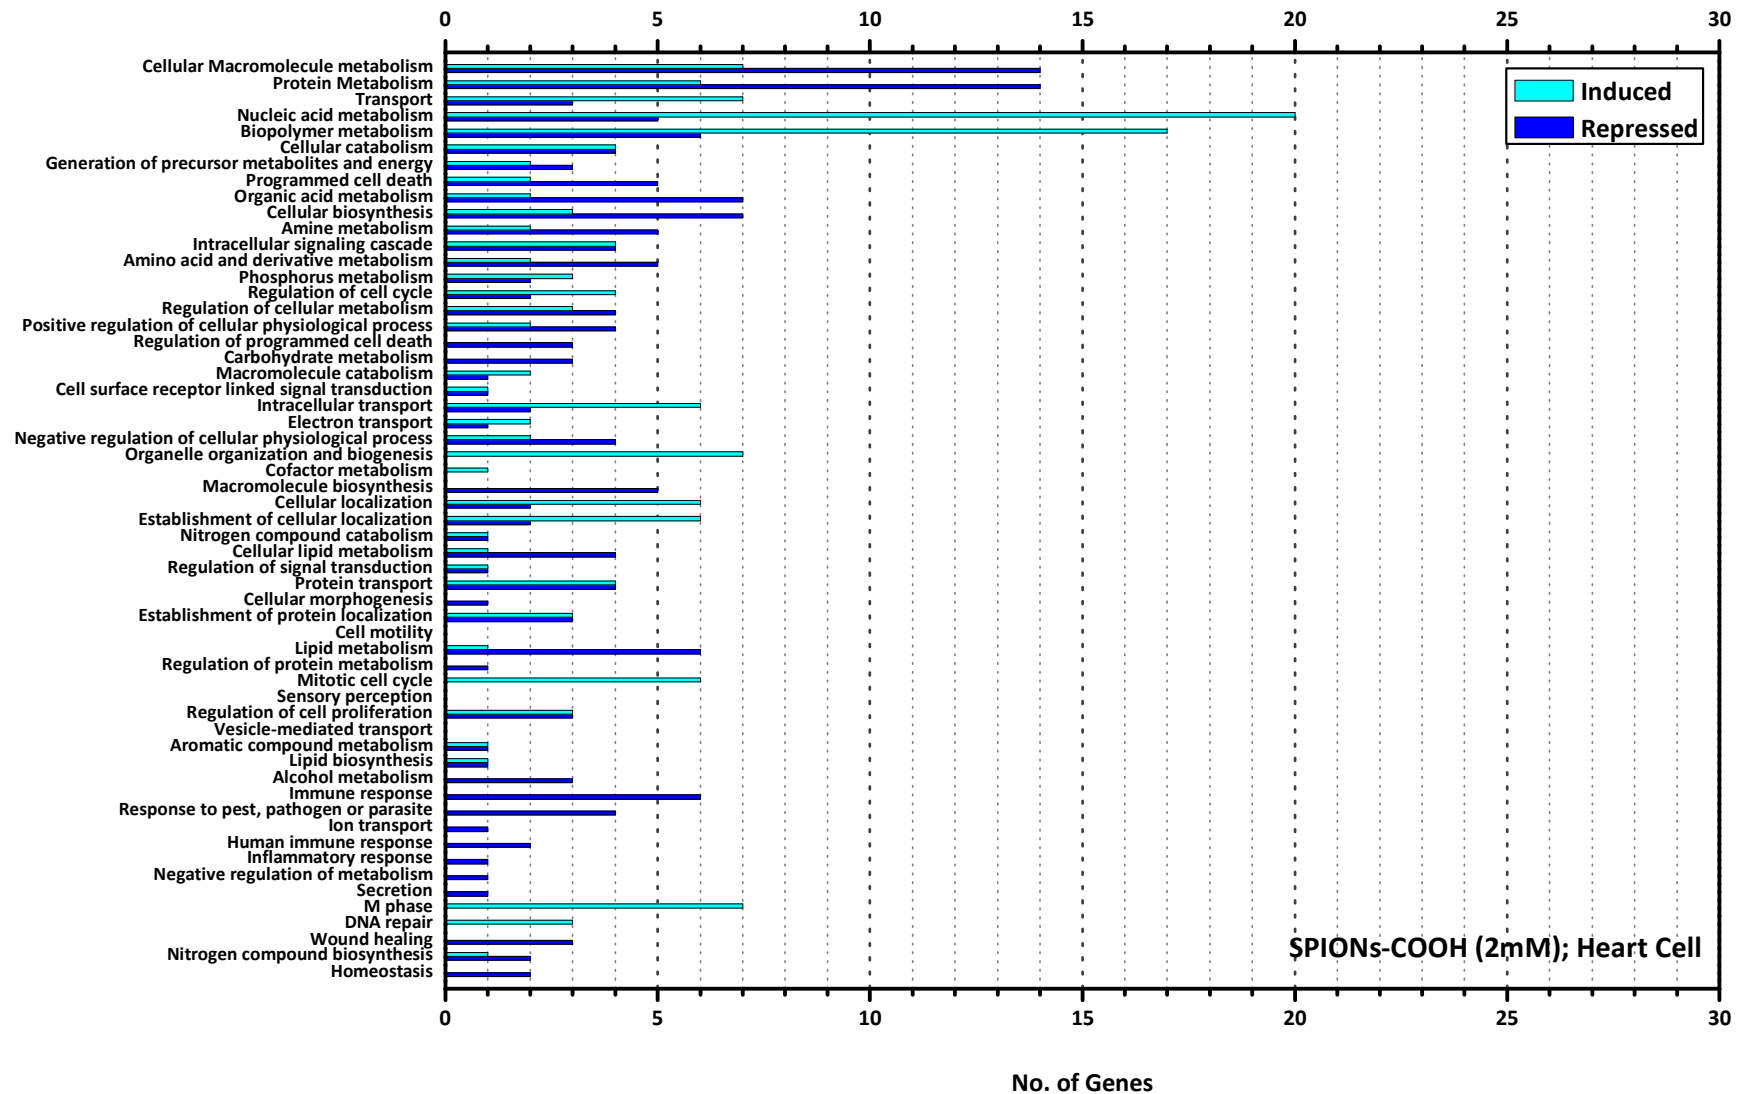

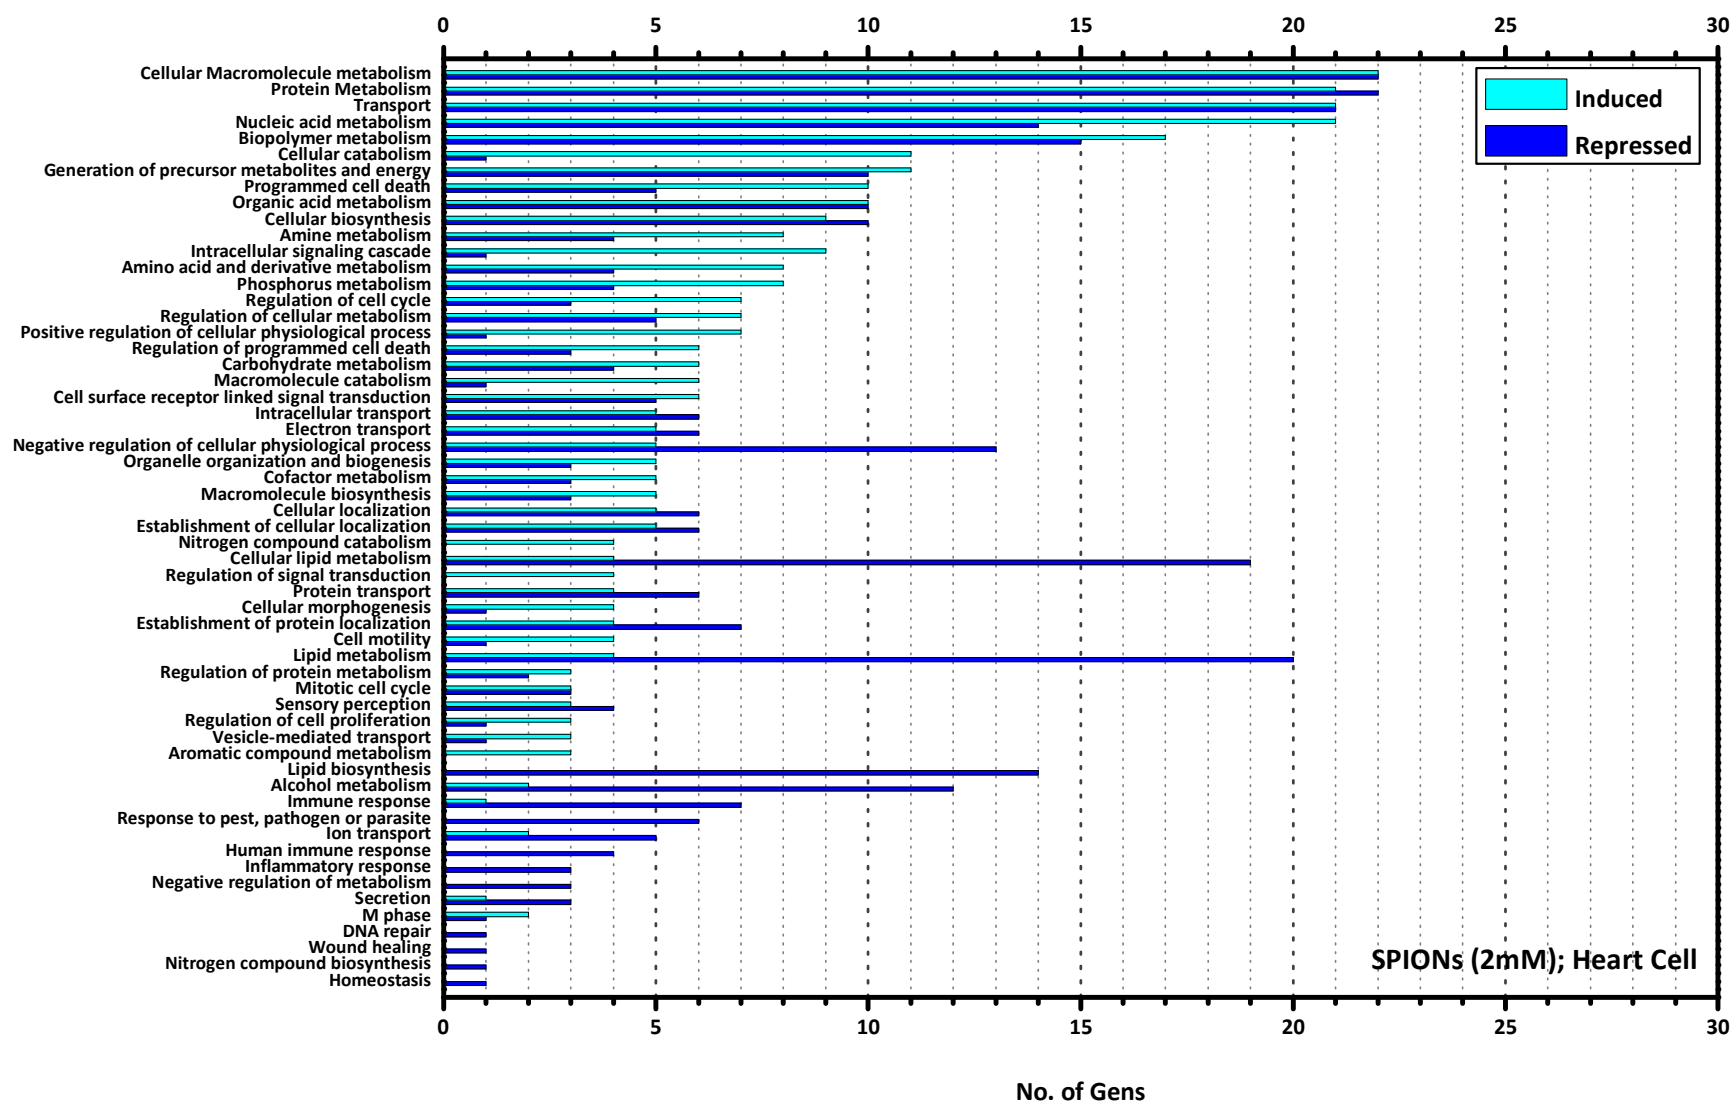

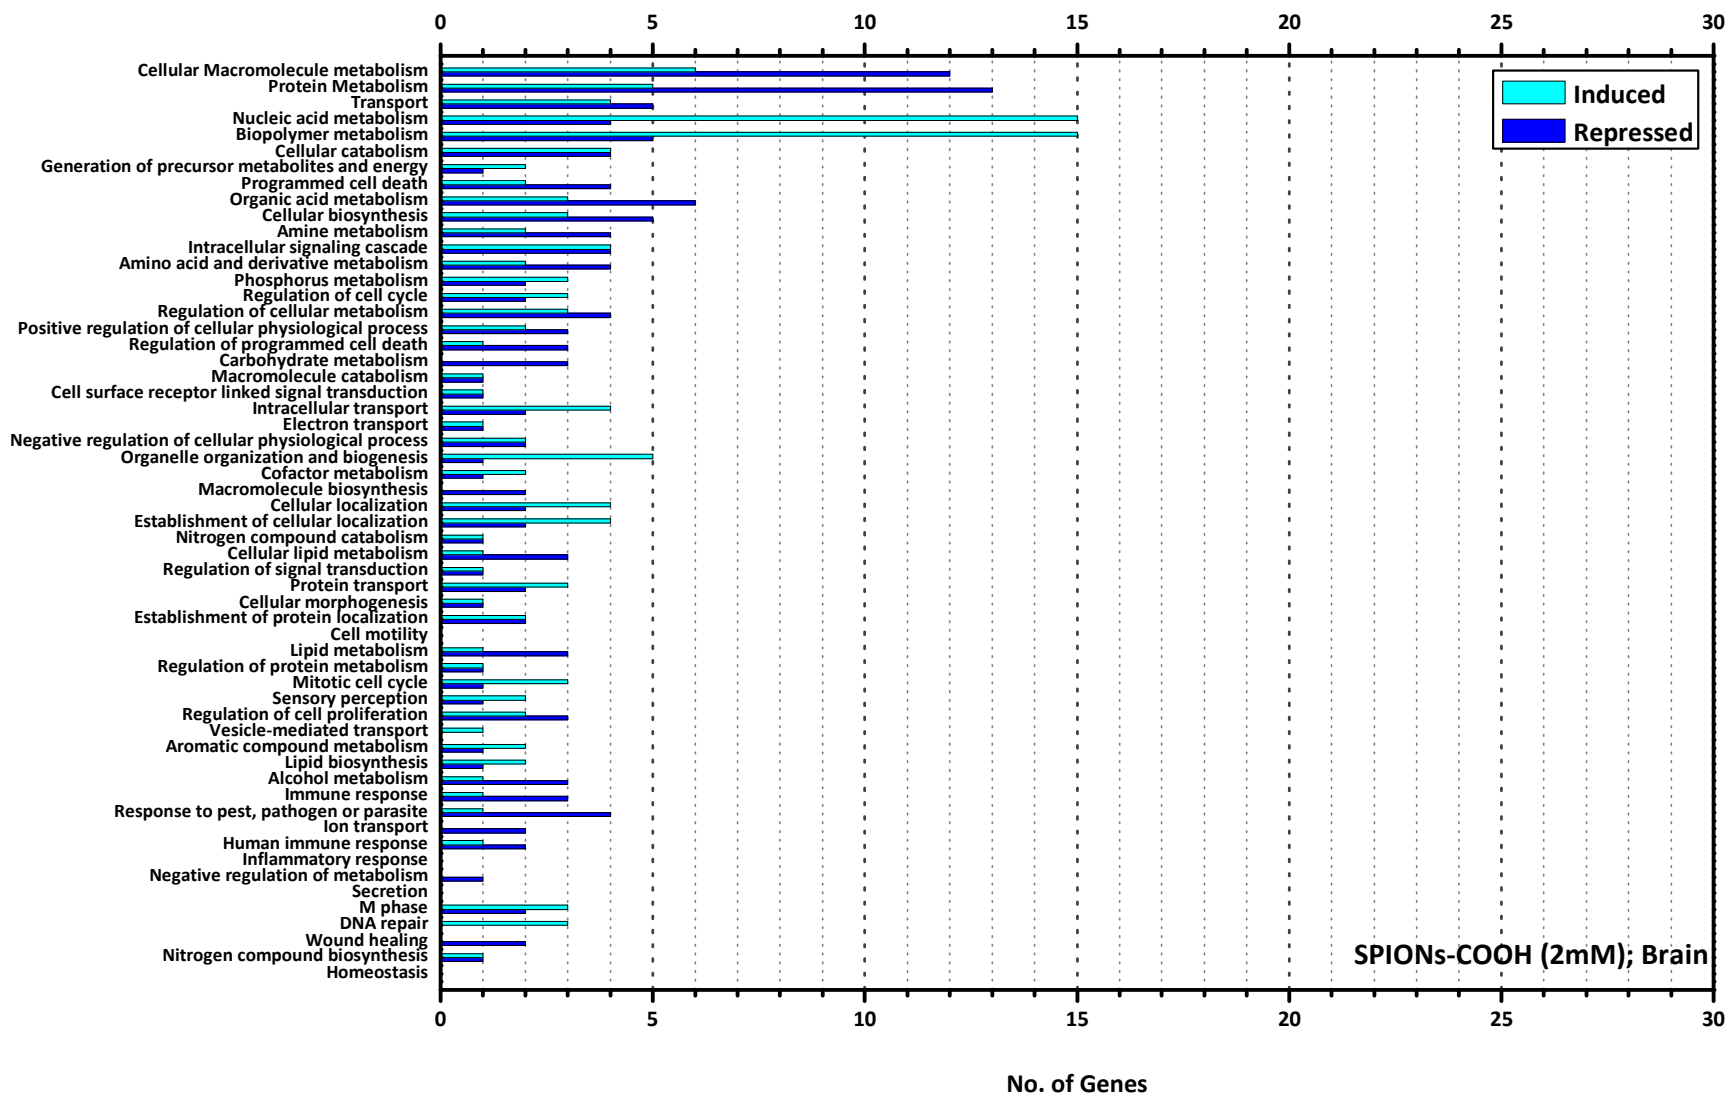

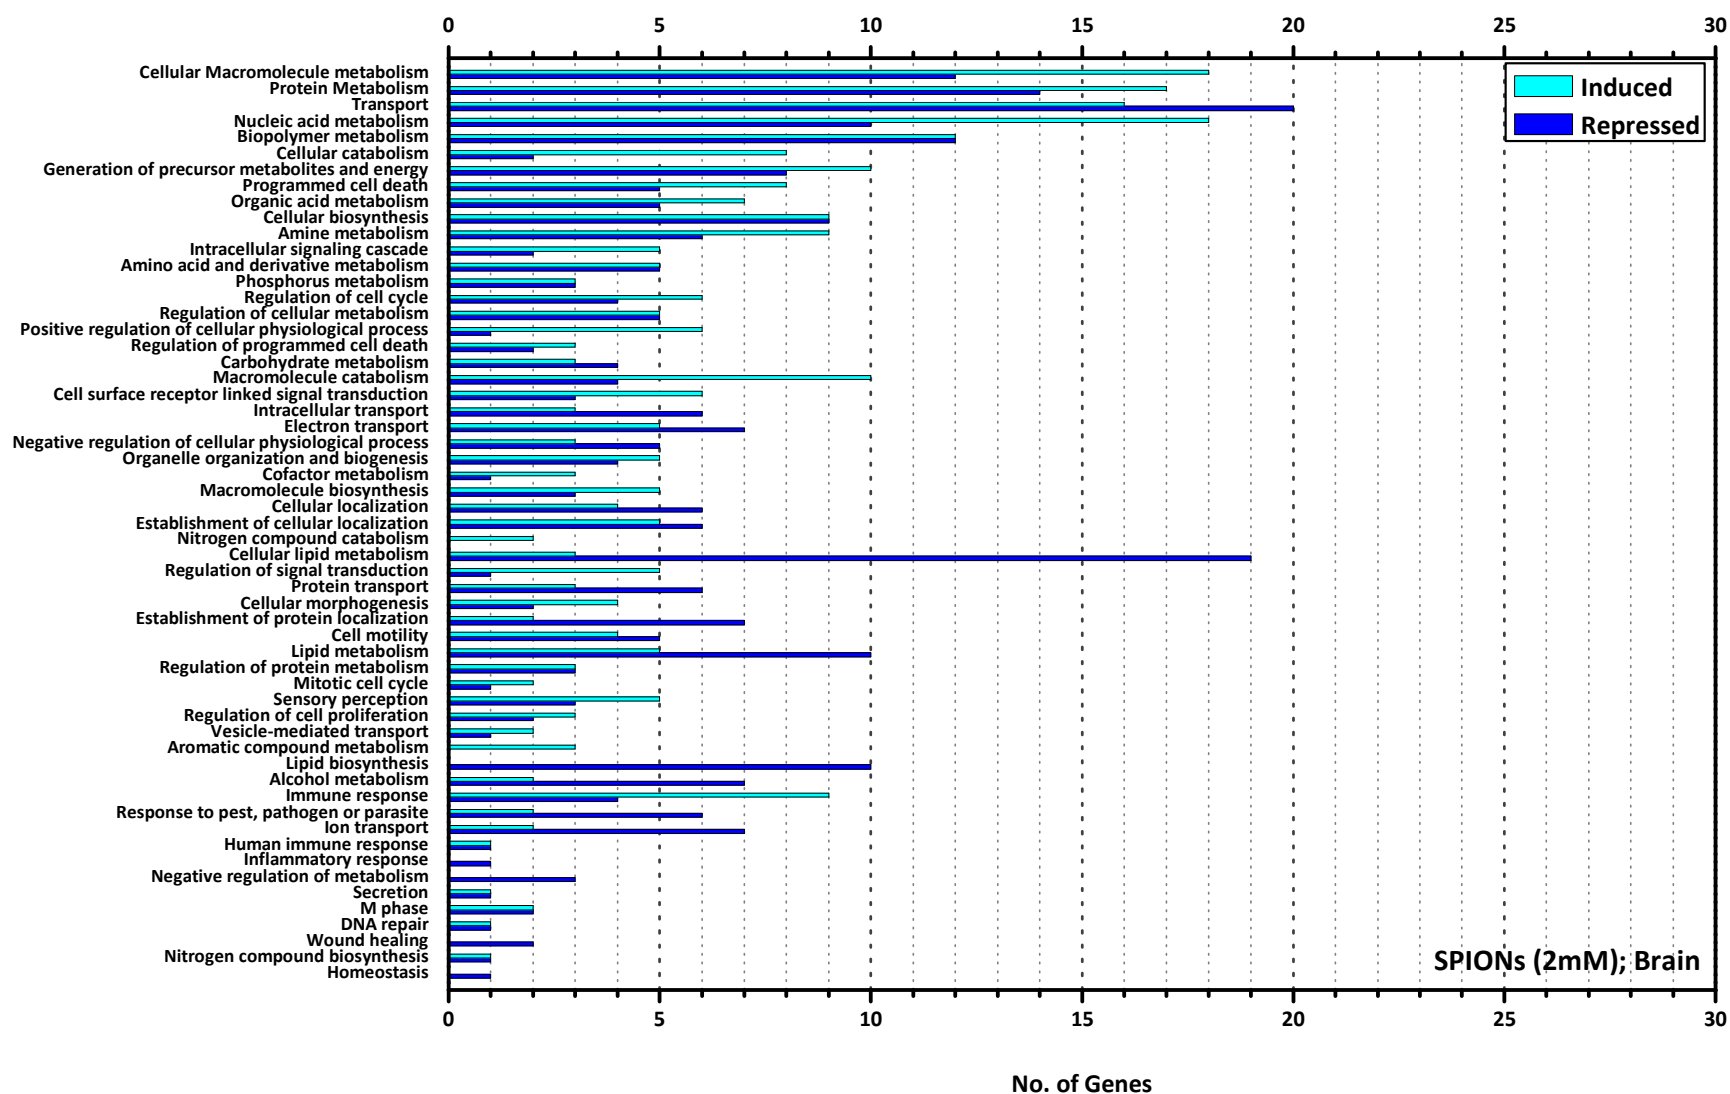

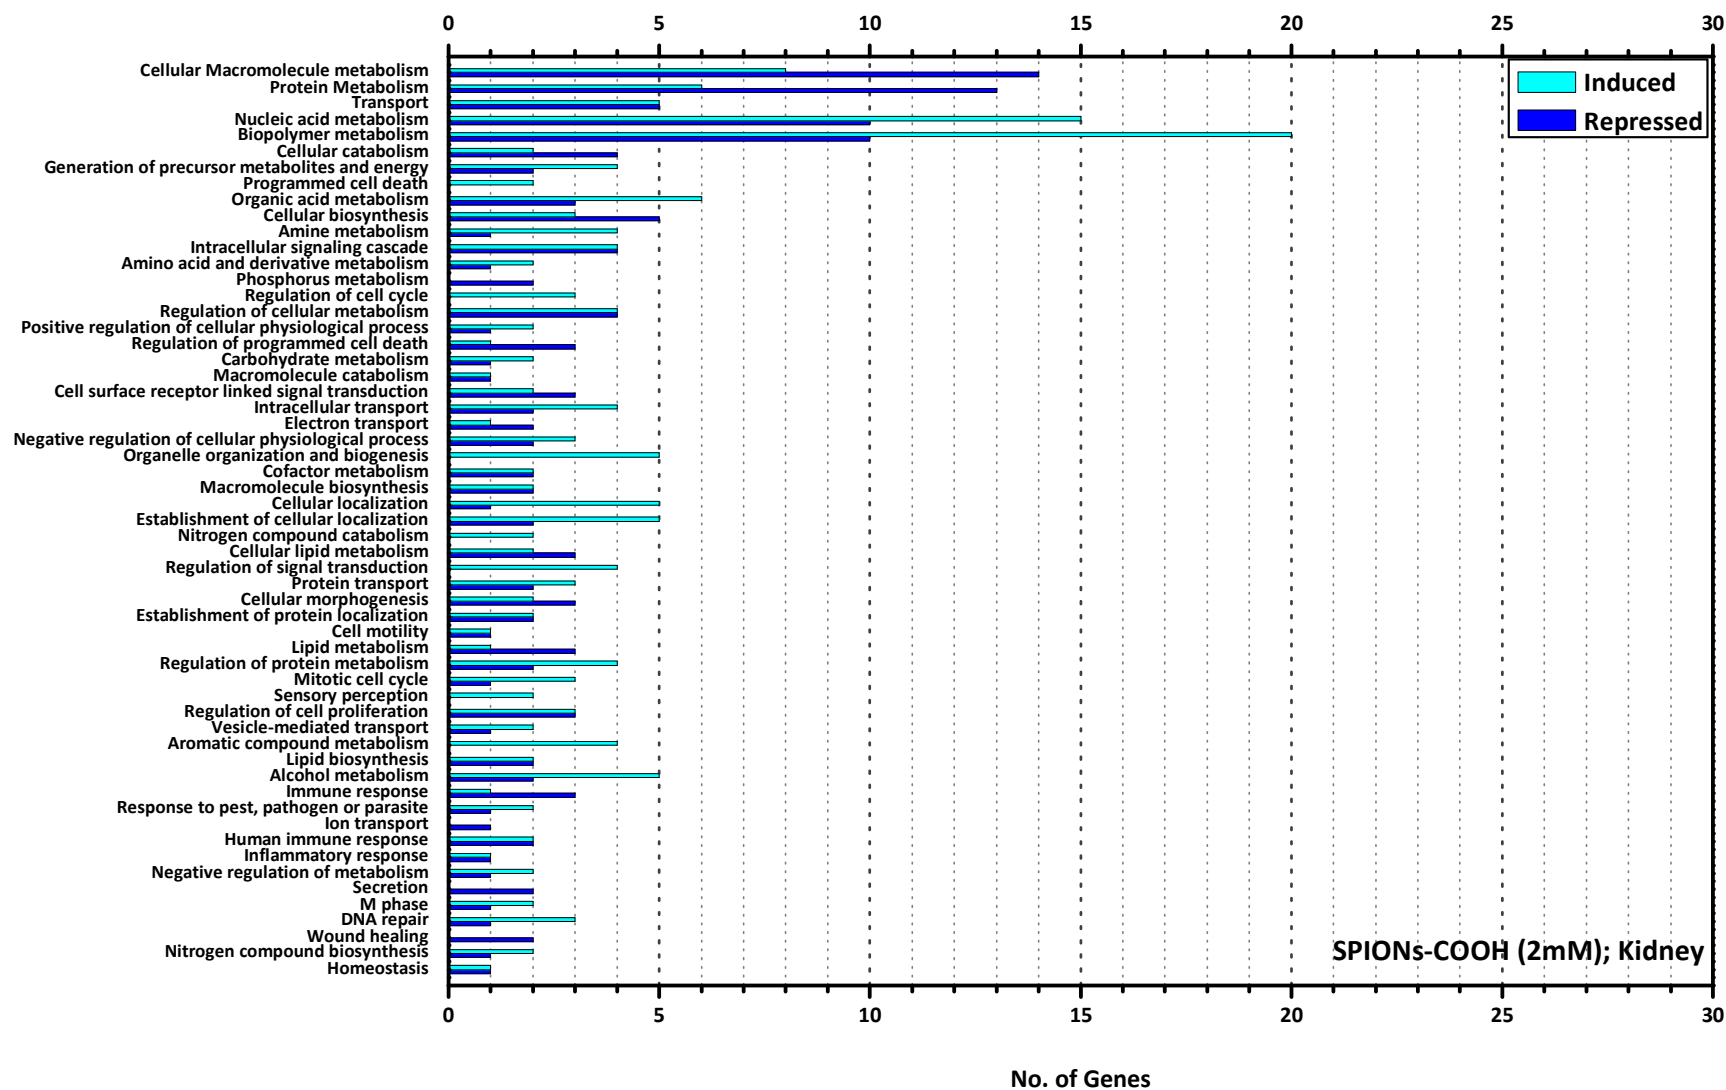

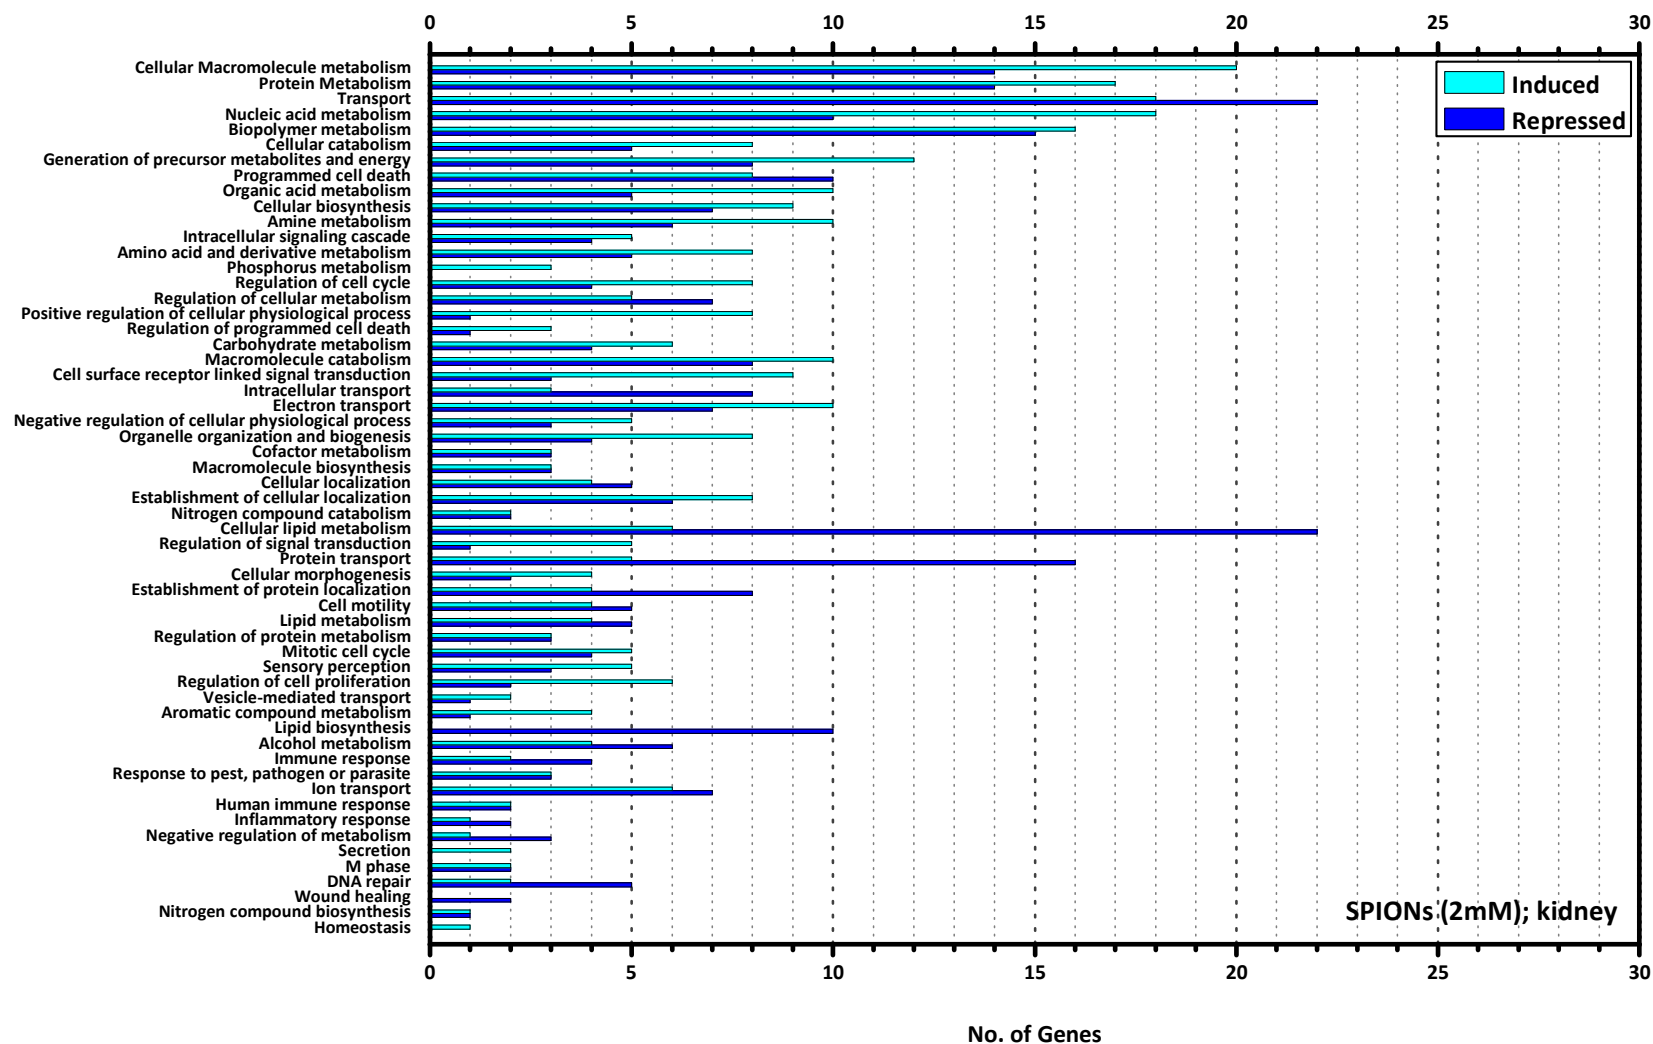

**Figure S1:** DNA microarray results for incubated HCM, BE-2-C, and 293T cells with 2mM of negative-SPIONs (i.e. SPIONs-COOH) and Bare-SPIONs.

**Table S1:** The 50 SPIONs-COOH specific genes most highly induced and repressed

| Genes<br>(Induction) | Heart          | Kidney         | Brain          | Genes<br>(Repression) | Heart              | Kidney             | Brain          |
|----------------------|----------------|----------------|----------------|-----------------------|--------------------|--------------------|----------------|
| SERPINE2             | 3.21 (<0.0001) | 0.40 (0.0733)  | 1.67 (0.0009)  | UBD                   | -3.21 (0.0121)     | 1.56 (0.646)       | 0.56 (0.4092)  |
| ABCC3                | 2.57 (0.0016)  | 0.84 (0.0982)  | 0.97 (0.0590)  | FABP1                 | -3.16 (0.0006)     | 0.04 (0.9016)      | -0.30 (0.3493) |
| LGALS3               | 2.30 (0.0012)  | 0.01 (0.9644)  | 0.28 (0.3796)  | CRYAA                 | -2.95 (0.0047)     | 0.12 (0.8284)      | -0.14 (0.7883) |
| GCLC                 | 2.24 (0.0081)  | 0.16 (0.5948)  | 0.92 (0.0619)  | EBP                   | -2.67 (0.0038)     | -0.03 (0.9513)     | -1.38 (0.0369) |
| CTSH                 | 2.16 (<0.0001) | 0.67 (0.0023)  | 0.92 (0.0007)  | LSS                   | -2.67 (0.0104)     | 0.01 (0.9932)      | -0.51 (0.4401) |
| AQP3                 | 2.14 (0.0075)  | -2.22 (0.0075) | -0.18 (0.6964) | RELN                  | -2.59 (0.0012)     | -0.93 (0.0376)     | -0.34 (0.2937) |
| BLVRB                | 2.14 (0.0026)  | 0.08 (0.8163)  | -0.03 (0.9302) | PDIA4                 | -2.54 (0.0015)     | -0.44 (0.2356)     | -0.55 (0.1940) |
| HPD                  | 2.14 (0.0005)  | 0.27 (0.2974)  | 0.64 (0.0396)  | HSD17B2               | -2.51 (0.0001)     | -1.12<br>(<0.0001) | -0.89 (0.0001) |
| CAPN2                | 2.12 (0.0001)  | -0.99 (0.0012) | -0.54 (0.0068) | NFKBIA                | -2.64 (0.0002)     | -0.57 (0.0330)     | -0.15 (0.4604) |
| ENO2                 | 2.07 (0.0001)  | 0.70 (0.0093)  | 0.90 (0.0072)  | FDPS                  | -2.43 (0.0058)     | 0.52 (0.3093)      | -0.72 (0.1836) |
| GLRX                 | 2.02 (0.0051)  | -0.71 (0.1824) | -0.57 (0.1876) | HMGCR                 | -2.40 (0.0109)     | -0.07 (0.8983)     | -0.92 (0.1579) |
| DFNA5                | 1.95 (0.0005)  | 0.48 (0.0601)  | 0.42 (0.1014)  | PROM1                 | -2.36 (0.0021)     | -0.03 (0.8575)     | 0.21 (0.3002)  |
| PHLDA2               | 1.95 (0.0007)  | -0.86 (0.0407) | 0.37 (0.3232)  | SQLE                  | -2.35 (0.0030)     | -0.36 (0.3670)     | -0.68 (0.1377) |
| HPCAL1               | 1.91 (<0.0001) | -0.12 (0.4707) | -0.24 (0.2654) | FDFT1                 | -2.34 (0.0157)     | 0.21 (0.7413)      | -0.17 (0.7886) |
| GCNT3                | 1.89 (0.0015)  | 0.83 (0.0278)  | 0.15 (0.5678)  | LIPA                  | -2.26 (0.0014)     | -0.40 (0.2406)     | -0.80 (0.0533) |
| CIDEC                | 1.83 (0.0163)  | -0.25 (0.5891) | -0.13 (0.7914) | DHCR7                 | -2.23 (0.0127)     | -0.45 (0.4471)     | -0.66 (0.2764) |
| CES1                 | 1.83 (0.0145)  | 0.72 (0.1962)  | 0.39 (0.4437)  | A2M                   | -2.13<br>(<0.0001) | -0.76 (0.0047)     | -0.37 (0.0425) |
| CDKN1A1              | 1.8 (0.0073)   | 0.11 (0.7963)  | 0.86 (0.0998)  | ARMET                 | -2.12 (0.0218)     | -0.65 (0.3279)     | -0.37 (0.5577) |
| ABCG2                | 1.69 (0.0027)  | 1.01 (0.0173)  | 1.31 (0.0105)  | TRA2A                 | -2.07 (0.0042)     | 0.31 (0.3641)      | -0.15 (0.7480) |
| STX3A                | 1.68 (0.0090)  | 0.26 (0.4930)  | 0.45 (0.2600)  | HSD17B7               | -2.02 (0.0016)     | -0.07 (0.8012)     | -0.64 (0.0586) |
| FAH                  | 1.67 (0.0004)  | 0.80 (0.0066)  | 0.68 (0.0124)  | C14orf1               | -2.01 (0.0323)     | 0.17 (0.7990)      | -1.32 (0.0998) |
| ENPP1                | 1.66 (0.0143)  | 0.40 (0.3827)  | 0.99 (0.0784)  | ALDH18A1              | -1.97 (0.0001)     | -0.85 (0.0012)     | -0.24 (0.1316) |



|        |               |                |               |        |                |                |                |
|--------|---------------|----------------|---------------|--------|----------------|----------------|----------------|
| ASNS   | 1.65 (0.0074) | -1.51 (0.0101) | 0.06 (0.8670) | HMGCS1 | -1.93 (0.0407) | 0.25 (0.7155)  | 0.00 (0.9980)  |
| IFTIM2 | 1.60 (0.0020) | 0.17 (0.4937)  | 1.24 (0.0064) | NDRG2  | -1.92 (0.0006) | -0.93 (0.0051) | -0.07 (0.7081) |
| FEZ2   | 1.60 (0.0001) | 0.43 (0.0129)  | 0.45 (0.0133) | PBP    | -1.89 (0.0001) | -0.68 (0.0089) | -0.80 (0.0153) |

**Table S2:** The 50 bare-SPIONs specific genes most highly induced and repressed

| Genes<br>(Induction) | Heart             | Kidney            | Brain          | Genes<br>(Repression) | Heart              | Kidney             | Brain          |
|----------------------|-------------------|-------------------|----------------|-----------------------|--------------------|--------------------|----------------|
| CCNB2                | 2.81 (0.0124)     | 2.44 (0.0202)     | 0.89 (0.2563)  | CLGN                  | -2.22 (0.0023)     | -1.64 (0.0059)     | -1.62 (0.0022) |
| MCM2                 | 2.67 (0.0037)     | 2.56 (0.0042)     | 2.02 (0.0102)  | OS-9                  | -2.09 (0.0003)     | -1.57 (0.0003)     | -1.01 (0.0017) |
| UBE2C                | 2.66 (0.0030)     | 2.58 (0.0033)     | 0.95 (0.0835)  | SERPINC1              | -2.04 (0.0001)     | -0.95 (0.0005)     | -1.48 (0.0007) |
| ZWINT                | 2.54 (0.0055)     | 2.56 (0.0053)     | 0.80 (0.1626)  | TNFSF10               | -2.04 (0.0025)     | -1.00 (0.0124)     | -1.84 (0.0069) |
| HIST1H4C             | 2.14<br>(<0.0001) | 2.48<br>(<0.0001) | 0.86 (0.0101)  | IFRD1                 | -1.86 (0.0031)     | -1.09 (0.0230)     | -0.91 (0.0375) |
| RNASEH2A             | 2.13 (0.0010)     | 1.91 (0.0012)     | 0.83 (0.0366)  | AZGP1                 | -1.85<br>(<0.0001) | -1.09<br>(<0.0001) | 0.28 (0.0965)  |
| TRIP13               | 2.04 (0.0004)     | 2.16 (0.0004)     | 0.93 (0.0106)  | SLC1A2                | -1.75 (0.0014)     | -1.34 (0.0089)     | -0.72 (0.0428) |
| PPIH                 | 1.85 (0.0005)     | 1.08 (0.0015)     | 0.67 (0.0163)  | ASNS                  | -1.75 (0.0065)     | 1.51 (0.0101)      | 0.06 (0.8670)  |
| ADM                  | 1.82 (0.0006)     | 0.62 (0.0050)     | 0.47 (0.0127)  | 16. Sep               | -1.56 (0.0066)     | -1.28 (0.0174)     | -1.09 (0.0082) |
| HMG2                 | 1.82 (0.0027)     | 1.33 (0.0087)     | 0.76 (0.0711)  | CALR                  | -1.50 (0.0027)     | -0.20 (0.0408)     | 0.58 (0.0106)  |
| RACGAP1              | 1.67 (0.0021)     | 1.78 (0.0006)     | -0.12 (0.6853) | GHITM                 | -1.49 (0.0108)     | -1.49 (0.1273)     | -0.77 (0.2546) |
| TUBA3                | 1.67 (0.0168)     | 0.54 (0.2131)     | 0.22 (0.5897)  | CDH2                  | -1.49 (0.0007)     | 0.29 (0.5353)      | 0.13 (0.6481)  |

|         |               |                       |               |            |                |                |                |
|---------|---------------|-----------------------|---------------|------------|----------------|----------------|----------------|
| ITGB3BP | 1.62 (0.0002) | 1.81 (0.0001)         | 1.06 (0.0001) | PSPH       | -1.42 (0.0086) | -0.97 (0.0230) | -1.59 (0.0089) |
| SNRPA   | 1.60 (0.0050) | 0.85 (0.0299)         | 0.65 (0.0628) | ALDH6A1    | -1.40 (0.0025) | -1.34 (0.0005) | -1.16 (0.0003) |
| SMC4L1  | 1.59 (0.0019) | 1.87 (0.0008)         | 0.52 (0.1063) | BCAT1      | -1.39 (0.0120) | -0.94 (0.0196) | -0.18 (0.7083) |
| PC4     | 1.55 (0.0024) | 0.18 (0.6953)         | 0.52 (0.2988) | TST        | -1.37 (0.0006) | -0.67 (0.0164) | -0.33 (0.1924) |
| NUP107  | 1.55 (0.0015) | 1.45 (0.0017)         | 0.86 (0.0199) | CLU        | -1.37 (0.0003) | -0.42 (0.0050) | -0.24 (0.0319) |
| TYMS    | 1.53 (0.0008) | 1.73<br>( $<0.0001$ ) | 1.16 (0.0001) | EPHX1      | -1.37 (0.0206) | -1.15 (0.0237) | -0.37 (0.2255) |
| SFRS7   | 1.52 (0.0065) | 0.72 (0.0706)         | 0.83 (0.0624) | BF         | -1.35 (0.0088) | -1.24 (0.0114) | -0.61 (0.1143) |
| CKS2    | 1.52 (0.0009) | 0.90 (0.0003)         | 0.38 (0.0856) | C6orf48    | -1.34 (0.0007) | -1.16 (0.0011) | -0.46 (0.0803) |
| DKK1    | 1.47 (0.0071) | 2.08 (0.0040)         | 0.72 (0.0561) | ST6GALNAC4 | -1.31 (0.0148) | -1.34 (0.0165) | 0.38 (0.1820)  |
| SFRS2   | 1.45 (0.0044) | 0.91 (0.0138)         | 1.11 (0.0063) | ARSE       | -1.26 (0.0001) | -0.65 (0.0002) | -0.22 (0.0577) |
| GTPBP6  | 1.44 (0.0015) | 0.88 (0.0055)         | 1.08 (0.0071) | ITIH3      | -1.25 (0.0111) | -0.47 (0.1769) | -0.32 (0.3277) |
| RFC2    | 1.38 (0.0034) | 1.01 (0.0177)         | 0.70 (0.1067) | TSPAN7     | -1.25 (0.0012) | -0.23 (0.4827) | -0.80 (0.0079) |
| CDKN3   | 1.37 (0.0018) | 1.41 (0.0018)         | 0.55 (0.0459) | IGSF1      | -1.24 (0.0054) | -0.19 (0.4596) | -0.45 (0.1426) |

### **Cellular organelle's staining**

CellPainter™ Organelle Markers are GFP- or RFP-tagged TrueORF cDNA clones that encode organelle-specific or structure-specific proteins (Origene, USA). The proteins are fused in-frame with different fluorescent proteins and allow clear visualization of the organelles or structures. All CellPainter™ Organelle marker plasmids are constructed using OriGene's TrueORF destination vectors. The fluorescent protein tags (turboGFP or turboRFP) are fused at the N- or C-terminus of the marker protein. All of the vectors can be selected with ampicillin (100ug/ml) in *E.coli* and with the neomycin analog, G418, in mammalian cells.

### **Protocol for transient transfection (adherent cells)**

On the day before transfection, the cells were plated at a density of  $1-3 \times 10^5$  cells in complete growth medium per well of a 6-well plate to obtain 50-70% confluence on the following day. After overnight incubation of the cells, they were transformed to a sterile plastic tube, and 100 uL of serum free medium was added. An appropriate amount of TurboFectin 8.0 (2-6 uL per 1 ug DNA) was added into tube and mixed completely by gentle pipetting followed by incubation at room temperature for 5 minutes. Plasmid DNA (1-3 ug per well) were poured to the TurboFectin-containing media prepared above and mixed by gentle pipetting. The mixture was incubate at room temperature for 30 min. The transfection was done in complete culture medium and the mixture was added dropwise to the cells followed by incubation for 48 hours.

**Protocol for Confocal Microscopy:**

At 30 hrs post-transfection, the cells were washed with cold PBS and then fixed with 4% formaldehyde in PBS for 20 min at room temperature. The cover slip was carefully transferred from well with cells face down to a glass slide with one drop of commercial mounting medium (VECTASHIELD®).

**Protocol for Stable Transfection:**

At 24 hrs post-transfection, the cells were transferred into fresh growth medium containing the selective agent, G418. After 1-2 weeks, a large number of the cells will be killed; the cells that remain growing in the selective medium have retained the expression plasmid, which stably integrates into the genome of the targeted cells. The mock control is also monitored to ensure the cells are dying.
